# Supplementary material for: The health impact on children affected by parental imprisonment
Source: PubMed Central journal article supplement — BMJ Paediatr Open. 2020 Feb 10;4(1):e000275. doi: 10.1136/bmjpo-2018-000275 (PMC7047477; doi:10.1136/bmjpo-2018-000275), 2020-02-10
Supplement: bmjpo-2018-000275.draft_revisions.pdf [file bmjpo-2018-000275.draft_revisions.pdf]

# BMJ Paediatrics Open

BMJ Paediatrics Open is committed to open peer review. As part of this commitment we make the peer review history of every article we publish publicly available.

When an article is published we post the peer reviewers' comments and the authors' responses online. We also post the versions of the paper that were used during peer review. These are the versions that the peer review comments apply to.

The versions of the paper that follow are the versions that were submitted during the peer review process. They are not the versions of record or the final published versions. They should not be cited or distributed as the published version of this manuscript.

BMJ Paediatrics Open is an open access journal and the full, final, typeset and author-corrected version of record of the manuscript is available on our site with no access controls, subscription charges or pay-per-view fees (<http://bmjpaedsopen.bmj.com>).

If you have any questions on BMJ Paediatrics Open's open peer review process please email [info.bmjpo@bmj.com](mailto:info.bmjpo@bmj.com)

# BMJ Paediatrics Open

## The health impact on children affected by parental imprisonment

|                               |                                                                                                                                                                                                    |
|-------------------------------|----------------------------------------------------------------------------------------------------------------------------------------------------------------------------------------------------|
| Journal:                      | <i>BMJ Paediatrics Open</i>                                                                                                                                                                        |
| Manuscript ID                 | bmjpo-2018-000275                                                                                                                                                                                  |
| Article Type:                 | Editorial                                                                                                                                                                                          |
| Date Submitted by the Author: | 06-Dec-2019                                                                                                                                                                                        |
| Complete List of Authors:     | Beresford, Sarah; Prison Reform Trust,<br>Loucks, Nancy; University of Strathclyde, Criminology; Families Outside, CEO<br>Raikes, Ben; University of Huddersfield, Behavioural and Social Sciences |
| Keywords:                     | Children's Rights, Child Psychology, Adolescent Health, General Paediatrics, Paediatric Practice                                                                                                   |
|                               |                                                                                                                                                                                                    |

SCHOLARONE™  
Manuscripts

## Title Page

1  
2  
3  
4  
5  
6  
7  
8  
9  
10  
11  
12  
13  
14  
15  
16  
17  
18  
19  
20  
21  
22  
23  
24  
25  
26  
27  
28  
29  
30  
31  
32  
33  
34  
35  
36  
37  
38  
39  
40  
41  
42  
43  
44  
45  
46  
47  
48  
49  
50  
51  
52  
53  
54  
55  
56  
57  
58  
59  
60

**Title:** **The health impact on children affected by parental imprisonment**

**Corresponding Author:** Sarah Beresford  
15 Northburgh St, London EC1V 0JR  
[sarah.beresford@prisonreformtrust.org.uk](mailto:sarah.beresford@prisonreformtrust.org.uk)  
Tel: 020 7251 5070, Fax: 020 7251 5076

**Co-authors:** Prof Nancy Loucks  
CEO  
Families Outside  
Edinburgh, UK

Mr Ben Raikes  
Senior Lecturer in Social Work  
Department of Behavioural and Social Sciences  
University of Huddersfield  
Huddersfield, UK

**Keywords:** Children's rights; child psychology; adolescent health; general paediatrics; paediatric practice

**Word Count:** 1434 words

**Funding:** This article is not funded

**Competing interests:** We do not have any competing interests

**Ethics approval statement:** This article did not involve human participants and does not require research ethics approval

**Contributorship Statement:** All three authors of this editorial piece have extensive experience of research related to the impact of parental experience on children and contributed to its content. The article was planned and submitted by Sarah Beresford, with significant contributions from Nancy Loucks and Ben Raikes. Nancy Loucks provided final editing of the article.

## The health impact on children affected by parental imprisonment

### Introduction

A number of studies<sup>1</sup> have highlighted the devastating impact of parental imprisonment on children. As well as a significant sense of loss, many children experience stigma, social isolation, shame, and fear.<sup>2</sup> Parental imprisonment can have a negative impact on children's short-term emotional wellbeing as well as their long-term health and social prospects.<sup>3</sup> Separation from a mother is particularly traumatic, and children affected by the imprisonment of a primary carer, usually a mother, often face greater disruption as it is more likely to involve other changes (e.g. carer, home and school).<sup>4</sup> Children with imprisoned mothers often reside with grandparents who may also need practical and financial support.<sup>5</sup>

Despite the adversities they face, children affected by imprisonment are rarely recognised as a distinct group within the systems and structures that should protect them, and no government agency is responsible for their wellbeing.<sup>6</sup> Whilst no systematic recording and monitoring system is in place, a 2019 report estimates that around 312,000 children are affected annually by parental imprisonment in England and Wales.<sup>7</sup>

### Parental imprisonment is an ACE

The imprisonment of a household member is one of the ten Adverse Childhood Experiences (ACEs) known to have a significant impact on long-term health and wellbeing.<sup>8</sup> Further, the imprisonment of a household member is associated with a fivefold increase in exposure to other ACEs.<sup>9</sup> The more ACEs a child suffers, the more likely this is to impact negatively on outcomes in terms of health, school attainment, and later life experiences. Recent research has highlighted that those with a higher exposure to ACEs are more likely to go on to develop health-harming and anti-social behaviours such as binge drinking, smoking, and drug use.<sup>10</sup> These poor health and social behaviour choices can lead to a more rapid development of diseases such as diabetes, cancer, cardiovascular disease, and mental illness.<sup>11</sup>

### The impact on health

A major pan-European study (COPING) investigated the mental health needs of children affected by parental imprisonment and children's resilience and coping strategies.<sup>12</sup> With an explicitly child-centred approach, the COPING study concluded that these children are at a significantly greater risk of suffering mental health difficulties than children who do not have parents in prison. Children with a parent in prison may experience low self-esteem, depression, disturbed sleeping patterns and symptoms of post-traumatic stress.<sup>13</sup>

A significant number of UK children in the COPING study needed to access counselling or other kinds of support outside the family. However, while a range of services and interventions exist, these are not often targeted towards the needs of children of prisoners; services are patchy, uncoordinated, and accessible by only a relatively small number of children. Many children of prisoners do not have enough support and often do not speak about what they have experienced, which may explain why they are more likely to experience mental health problems than other children.<sup>14</sup>

An American study showed that children of incarcerated parents are a vulnerable population who experience disadvantages across an array of health outcomes, including learning disabilities,

1  
2  
3 attention deficit disorder and attention deficit hyperactivity disorder, developmental delays, speech  
4 or language problems, as well as a higher rate of physical health conditions such as asthma and  
5 obesity.<sup>15</sup> These effects are more pronounced for children with an imprisoned parents than for  
6 children who experience parental divorce or death.<sup>16</sup> A recent Dutch study suggests a link between  
7 parental imprisonment and premature death.<sup>17</sup>  
8  
9

### 10 **What can health professionals do?**

11 Families affected by imprisonment are often reluctant to access support from outside agencies.<sup>18</sup>  
12 This may be due to shame and stigma, a lack of knowledge of what support is available, or a mistrust  
13 of statutory services. Health professionals who have an established relationship with families can be  
14 a gateway to further support and can ensure that staff are aware of, and trained in how to recognise  
15 and deal with, issues around imprisonment.<sup>19</sup> Health professionals are well placed to build positive  
16 relationships actively with families affected by imprisonment and help carers to access additional  
17 forms of support. They can ensure families are aware of the full range of services available to them,  
18 including those that support families affected by substance misuse, domestic abuse, or physical or  
19 mental health problems and can encourage family members to engage with other agencies in the  
20 community.  
21  
22  
23  
24  
25

### 26 **Seeing the potential in every child**

27 Some studies suggest that children of prisoners are more likely to end up in the criminal justice  
28 system as adults<sup>20</sup> or be involved in anti-social behaviour<sup>21</sup>. What is crucial to understand, however,  
29 is that criminality is not an infection that can be passed on; rather it is the grief experienced by  
30 children, compounded by trauma, stigma, and practical implications such as loss of income or  
31 housing which can lead to disengagement from school and a mistrust of authority. This in turn  
32 increases the potential to be involved in at-risk behaviour. In other words, it is not the imprisonment  
33 of the parent in and of itself, but the response to the imprisonment (social isolation and a sense of  
34 shame in addition to trauma) that increases the risk factor.  
35  
36  
37  
38

39 Paediatricians who have positive relationships with children and their families can help children by  
40 seeing the potential they have, rather than the problems they face. As [this video](#)<sup>22</sup> demonstrates, if  
41 children and young people are given a vision of hope, and feel that they have potential to change, it  
42 can make all the difference. Having a parent in prison is one of life's most challenging experiences,  
43 but it does not have to define a child's life. Paediatricians and health professionals are key to helping  
44 each child realise their potential.  
45  
46  
47  
48  
49

---

50  
51 <sup>1</sup> Condry, R. and Scharff Smith, P. (Ed.) (2018) *Prisons, Punishment, and the Family: Towards a New Sociology of*  
52 *Punishment?* Oxford University Press

53 <sup>2</sup> [childrenofprisoners.eu/the-issues/](http://childrenofprisoners.eu/the-issues/)

54 <sup>3</sup> McGillivray, C. (2016) *Rendering them Visible: a review of progress towards increasing awareness and support*  
55 *of prisoners' families*. Edinburgh: Families Outside.

56 <https://www.familiesoutside.org.uk/content/uploads/2017/12/Rendering-Them-Visible-FINAL.pdf>

57 <sup>4</sup> Minson, S. (2017) *Who Cares? Analysing the place of children in maternal sentencing decisions in England and*  
58 *Wales*. DPhil Thesis, University of Oxford. Also Beresford, S. (2018) *What About Me? The impact on children*  
59 *when mothers are involved in the criminal justice system*. London: Prison Reform Trust.  
60

- 1  
2  
3  
4  
5  
6  
7  
8  
9  
10  
11  
12  
13  
14  
15  
16  
17  
18  
19  
20  
21  
22  
23  
24  
25  
26  
27  
28  
29  
30  
31  
32  
33  
34  
35  
36  
37  
38  
39  
40  
41  
42  
43  
44  
45  
46  
47  
48  
49  
50  
51  
52  
53  
54  
55  
56  
57  
58  
59  
60
- 
- <sup>5</sup> Raikes, B. (2016). Unsung heroines: Celebrating the care provided by grandmothers for children with parents in prison. *Probation Journal*, 63(3), 320-330
- <sup>6</sup> Williams, K., Papadopoulou, V. and Booth, N. (2012) *Prisoners' childhood and family backgrounds: Results from the Surveying Prisoner Crime Reduction (SPCR) Longitudinal Cohort Study of Prisoners*, London: Ministry of Justice.
- <sup>7</sup> *op. cit.* endnote 1
- <sup>8</sup> Felitti, V.J., Anda, R.F, Nordenberg, D, Williamson, D.F., Spitz, A.M., Edwards, V., Koss, M.P. and Marks, J.S. (1998). "Relationship of Childhood Abuse and Household Dysfunction to Many of the Leading Causes of Death in Adults." *American Journal of Preventive Medicine* 14(4), 245-258.
- <sup>9</sup> Turney, K. (2018) Adverse childhood experiences among children of incarcerated parents." *Children and Youth Services Review* 89, 218-225.
- <sup>10</sup> Health Scotland (2017). *Tackling the attainment gap by preventing and responding to Adverse Childhood Experiences (ACEs)*.
- <sup>11</sup> Turney, K., *op cit.* endnote 8.
- <sup>12</sup> Jones, A., Gallagher, B., Manby, M., Robertson, O., Schützwahl, M., Berman, A.H., Hirschfield, A., Ayre, L., Urban, M. and Sharratt, K. (2013) *COPING: Children of Prisoners, Interventions & Mitigations to Strengthen Mental Health*.
- <sup>13</sup> Myers, B.J., Smarsh, T.M., Amlund-Hagen, K. and Kennon, S. (1999) 'Children of Incarcerated Mothers', *Journal of Child and Family Studies*, 8 (1), 11–25.
- <sup>14</sup> Jones *et al.*, *op cit.* endnote 10.
- <sup>15</sup> Turney, K. (2014) "Stress Proliferation across generation? Examining the Relationship between Parental Incarceration and Childhood Health." *Journal of Health and Social Behavior* 55(3), 302-319.
- <sup>16</sup> Dumont, D. M., Allen, S. A., and Rich, J. D. (2014) "Sesame Street Goes to Jail: Physicians Should Follow." *Annals of Internal Medicine* 161(7), 522-523. <https://annals.org/aim/article-abstract/1911123/sesame-street-goes-jail-physicians-should-follow> (accessed 13 November 2019)
- <sup>17</sup> van de Weijer, S.G.A., Smallbone, H.S., and Bouwman, V. (2018) 'Parental Imprisonment and Premature Mortality in Adulthood', *Journal of Developmental and Life-Course Criminology*, 4(2), 1–14.
- <sup>18</sup> Pugh, G. and Lanskey, C. (2011) "'Dads Inside and Out': study of risk and protective factors in the resettlement of imprisoned fathers with their families". Conference paper for What's new in Research and Evaluation? Informing our work with prisoners and offenders and their families. Institute of Criminology, University of Cambridge, 19 May 2011.
- <sup>19</sup> Families Outside (n.d.) *Supporting Prisoners' Families: What can Health Professionals do?* Edinburgh: Families Outside. <https://www.familiesoutside.org.uk/content/uploads/2019/07/Families-Outside-Health-web.pdf> (accessed 14 November 2019).
- <sup>20</sup> Butterfield, F. (1999) "Parents in Prison: A Special Report: As Inmate Population Grows, So Does a Focus on Children". *New York Times*, 7 April 1999.
- <sup>21</sup> Murray, J. and Farrington, D. P. (2008) "The Effects of Parental Imprisonment on Children," in M. Tonry (ed.) *Crime and Justice: A Review of Research* 37. Chicago: University of Chicago Press, 133-206.
- <sup>22</sup> Available at: <https://www.youtube.com/watch?v=kKZP0QKnNYg> (accessed 14 November 2019).

# BMJ Paediatrics Open

## The health impact on children affected by parental imprisonment

|                               |                                                                                                                                                                                                    |
|-------------------------------|----------------------------------------------------------------------------------------------------------------------------------------------------------------------------------------------------|
| Journal:                      | <i>BMJ Paediatrics Open</i>                                                                                                                                                                        |
| Manuscript ID                 | bmjpo-2018-000275.R1                                                                                                                                                                               |
| Article Type:                 | Editorial                                                                                                                                                                                          |
| Date Submitted by the Author: | 17-Jan-2020                                                                                                                                                                                        |
| Complete List of Authors:     | Beresford, Sarah; Prison Reform Trust,<br>Loucks, Nancy; University of Strathclyde, Criminology; Families Outside, CEO<br>Raikes, Ben; University of Huddersfield, Behavioural and Social Sciences |
| Keywords:                     | Children's Rights, Child Psychology, Adolescent Health, General Paediatrics, Paediatric Practice                                                                                                   |
|                               |                                                                                                                                                                                                    |

SCHOLARONE™  
Manuscripts

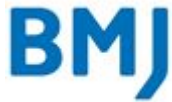

I, the Submitting Author has the right to grant and does grant on behalf of all authors of the Work (as defined in the below author licence), an exclusive licence and/or a non-exclusive licence for contributions from authors who are: i) UK Crown employees; ii) where BMJ has agreed a CC-BY licence shall apply, and/or iii) in accordance with the terms applicable for US Federal Government officers or employees acting as part of their official duties; on a worldwide, perpetual, irrevocable, royalty-free basis to BMJ Publishing Group Ltd ("BMJ") its licensees and where the relevant Journal is co-owned by BMJ to the co-owners of the Journal, to publish the Work in this journal and any other BMJ products and to exploit all rights, as set out in our [licence](#).

The Submitting Author accepts and understands that any supply made under these terms is made by BMJ to the Submitting Author unless you are acting as an employee on behalf of your employer or a postgraduate student of an affiliated institution which is paying any applicable article publishing charge ("APC") for Open Access articles. Where the Submitting Author wishes to make the Work available on an Open Access basis (and intends to pay the relevant APC), the terms of reuse of such Open Access shall be governed by a Creative Commons licence – details of these licences and which [Creative Commons](#) licence will apply to this Work are set out in our licence referred to above.

Other than as permitted in any relevant BMJ Author's Self Archiving Policies, I confirm this Work has not been accepted for publication elsewhere, is not being considered for publication elsewhere and does not duplicate material already published. I confirm all authors consent to publication of this Work and authorise the granting of this licence.



**Title Page**

**Title:** **The health impact on children affected by parental imprisonment**

**Corresponding Author:** Sarah Beresford  
15 Northburgh St, London EC1V 0JR  
[s.g.roberts44@gmail.com](mailto:s.g.roberts44@gmail.com)  
Tel: 020 7251 5070, Fax: 020 7251 5076

**Co-authors:** Prof Nancy Loucks  
CEO  
Families Outside  
Edinburgh, UK

Mr Ben Raikes  
Senior Lecturer in Social Work  
Department of Behavioural and Social Sciences  
University of Huddersfield  
Huddersfield, UK

**Keywords:** Children's rights; child psychology; adolescent health; parental imprisonment; paediatric practice

**Word Count:** 1558 words

**Funding:** This article is not funded

**Competing interests:** We do not have any competing interests

**Ethics approval statement:** This article did not involve human participants and does not require research ethics approval

**Contributorship Statement:** All three authors of this editorial piece have extensive experience of research related to the impact of parental experience on children and contributed to its content. The article was planned and submitted by Sarah Beresford, with significant contributions from Nancy Loucks and Ben Raikes. Nancy Loucks provided final editing of the article.

## The health impact on children affected by parental imprisonment

### Introduction

Scotland, England, and Wales have the highest imprisonment rates in western Europe.<sup>1</sup> A number of studies<sup>2</sup> have highlighted the devastating impact of parental imprisonment on children. As well as a significant sense of loss, many children experience stigma, social isolation, shame, and fear.<sup>3</sup> This underlines the need to use non-custodial measures wherever possible to reduce the disruption and trauma of a parent's imprisonment.<sup>4</sup> Parental imprisonment can have a negative impact on children's short-term emotional wellbeing as well as their long-term health and social prospects.<sup>5</sup> Women, who are more likely to be primary carers, tend to receive short sentences for non-violent crimes without consideration of the impact on their children.<sup>6</sup> Separation from a mother is particularly traumatic, and children affected often face greater disruption as it is more likely to involve other changes (e.g. carer, home and school).<sup>7</sup> Children with imprisoned mothers often reside with grandparents who may also need practical and financial support.<sup>8</sup>

Despite the adversities they face, children affected by imprisonment are rarely recognised as a distinct group within the systems and structures that should protect them, and no government agency is responsible for their wellbeing.<sup>9</sup> Whilst no systematic recording and monitoring system is in place, a 2019 report estimates that around 312,000 children are affected annually by parental imprisonment in England and Wales.<sup>10</sup>

### Parental imprisonment is an ACE

The imprisonment of a household member is one of the ten Adverse Childhood Experiences (ACEs) known to have a significant impact on long-term health and wellbeing.<sup>11</sup> Further, the imprisonment of a household member is associated with a fivefold increase in exposure to other ACEs.<sup>12</sup> The more ACEs a child suffers, the more likely this is to impact negatively on outcomes in terms of health, school attainment, and later life experiences. Recent research has highlighted that those with a higher exposure to ACEs are more likely to go on to develop health-harming and anti-social behaviours such as binge drinking, smoking, and drug use.<sup>13</sup> Poor health and social behaviour can lead to a more rapid development of diseases such as diabetes, cancer, cardiovascular disease, and mental illness.<sup>14</sup>

### The impact on health

A major pan-European study (COPING) investigated the mental health needs of children affected by parental imprisonment and children's resilience and coping strategies.<sup>15</sup> With an explicitly child-centred approach, the COPING study concluded that these children are at a significantly greater risk of suffering mental health difficulties than children who do not have parents in prison. Children with a parent in prison may experience low self-esteem, depression, disturbed sleeping patterns and symptoms of post-traumatic stress.<sup>16</sup> In a North American study, separation from a parent through imprisonment was found to be more detrimental to a child's well-being than divorce or the death of a parent.<sup>17</sup>

A significant number of UK children in the COPING study needed to access counselling or other kinds of support outside the family. However, while a range of services and interventions exist, these are not often targeted towards the needs of children of prisoners; services are patchy, uncoordinated,

1  
2  
3 and accessible by only a relatively small number of children. Many children of prisoners do not have  
4 enough support and often do not speak about what they have experienced, which may explain why  
5 they are more likely to experience mental health problems than other children.<sup>18</sup>  
6  
7

8 An American study showed that children of incarcerated parents are a vulnerable population who  
9 experience disadvantages across an array of health outcomes, including learning disabilities,  
10 attention deficit disorder and attention deficit hyperactivity disorder, developmental delays, speech  
11 or language problems, as well as a higher rate of physical health conditions such as asthma and  
12 obesity.<sup>19</sup> A recent Dutch study suggests a link between parental imprisonment and premature  
13 death.<sup>20</sup>  
14  
15

### 16 17 **What can health professionals do?**

18 Families affected by imprisonment are often reluctant to access support from outside agencies.<sup>21</sup>  
19 This may be due to shame and stigma, a lack of knowledge of what support is available, or a mistrust  
20 of statutory services. Health professionals who have an established relationship with families can be  
21 a gateway to further support and can ensure that staff are aware of, and trained in how to recognise  
22 and deal with, issues around imprisonment.<sup>22</sup> Health professionals are well placed to build positive  
23 relationships actively with families affected by imprisonment and help carers to access additional  
24 forms of support. They can ensure families are aware of the full range of services available to them,  
25 including those that support families affected by substance misuse, domestic abuse, or physical or  
26 mental health problems and can encourage family members to engage with other agencies in the  
27 community.  
28  
29  
30  
31  
32

### 33 **Seeing the potential in every child**

34 Some studies suggest that children of prisoners are more likely to end up in the criminal justice  
35 system as adults<sup>23</sup> or be involved in anti-social behaviour<sup>24</sup>. What is crucial to understand, however,  
36 is that criminality is not an infection that can be passed on; rather it is the grief experienced by  
37 children, compounded by trauma, stigma, and practical implications such as loss of income or  
38 housing which can lead to disengagement from school and a mistrust of authority. This in turn  
39 increases the potential to be involved in at-risk behaviour. In other words, it is not the imprisonment  
40 of the parent in and of itself, but the response to the imprisonment (social isolation and a sense of  
41 shame in addition to trauma) that increases the risk factor.  
42  
43  
44

45 Primary health teams, with positive relationships with children and their families, can help children  
46 by seeing the potential they have, rather than the problems they face. As [this video<sup>25</sup>](#) demonstrates,  
47 if children and young people are given a vision of hope, and feel that they have potential to change,  
48 it can make all the difference. Having a parent in prison is one of life's most challenging experiences,  
49 but it does not have to define a child's life. Primary health care professionals are key to helping each  
50 child realise their potential.  
51  
52  
53  
54  
55  
56

---

57  
58 <sup>1</sup> World Prison Brief, January 2020. [https://www.prisonstudies.org/highest-to-](https://www.prisonstudies.org/highest-to-lowest/prison_population_rate?field_region_taxonomy_tid=14)  
59 [lowest/prison\\_population\\_rate?field\\_region\\_taxonomy\\_tid=14](https://www.prisonstudies.org/highest-to-lowest/prison_population_rate?field_region_taxonomy_tid=14) (accessed 9 January 2020)  
60

- 1  
2  
3
- 
- 4 <sup>2</sup> Condry, R. and Scharff Smith, P. (Ed.) (2018) *Prisons, Punishment, and the Family: Towards a New Sociology of Punishment?* Oxford University Press
- 5 <sup>3</sup> [childrenofprisoners.eu/the-issues/](https://childrenofprisoners.eu/the-issues/)
- 6 <sup>4</sup> Council of Europe (2018) *Recommendation CM/Rec(2018)5 of the Committee of Ministers to member States concerning children with imprisoned parents* [online], available
- 7 from: [https://search.coe.int/cm/Pages/result\\_details.aspx?ObjectId=09000016807b3175](https://search.coe.int/cm/Pages/result_details.aspx?ObjectId=09000016807b3175) (accessed 9 January 2020)
- 8 <sup>5</sup> McGillivray, C. (2016) *Rendering them Visible: a review of progress towards increasing awareness and support of prisoners' families*. Edinburgh: Families Outside.
- 9 <https://www.familiesoutside.org.uk/content/uploads/2017/12/Rendering-Them-Visible-FINAL.pdf>
- 10 <sup>6</sup> Baldwin, L. and Epstein, R. (2017) *Short but not Sweet: a study of the impact of short custodial sentences on mothers and their children*. Leicester: De Montfort University.
- 11 <sup>7</sup> Minson, S. (2017) *Who Cares? Analysing the place of children in maternal sentencing decisions in England and Wales*. DPhil Thesis, University of Oxford. Also Beresford, S. (2018) *What About Me? The impact on children when mothers are involved in the criminal justice system*. London: Prison Reform Trust.
- 12 <sup>8</sup> Raikes, B. (2016). Unsung heroines: Celebrating the care provided by grandmothers for children with parents in prison. *Probation Journal*, 63(3), 320-330
- 13 <sup>9</sup> Williams, K., Papadopoulou, V. and Booth, N. (2012) *Prisoners' childhood and family backgrounds: Results from the Surveying Prisoner Crime Reduction (SPCR) Longitudinal Cohort Study of Prisoners*, London: Ministry of Justice.
- 14 <sup>10</sup> *op. cit.* endnote 1
- 15 <sup>11</sup> Felitti, V.J., Anda, R.F., Nordenberg, D., Williamson, D.F., Spitz, A.M., Edwards, V., Koss, M.P. and Marks, J.S. (1998). "Relationship of Childhood Abuse and Household Dysfunction to Many of the Leading Causes of Death in Adults." *American Journal of Preventive Medicine* 14(4), 245-258.
- 16 <sup>12</sup> Turney, K. (2018) Adverse childhood experiences among children of incarcerated parents." *Children and Youth Services Review* 89, 218-225.
- 17 <sup>13</sup> Health Scotland (2017). *Tackling the attainment gap by preventing and responding to Adverse Childhood Experiences (ACEs)*.
- 18 <sup>14</sup> Turney, K., *op cit.* endnote 8.
- 19 <sup>15</sup> Jones, A., Gallagher, B., Manby, M., Robertson, O., Schützwohl, M., Berman, A.H., Hirschfield, A., Ayre, L., Urban, M. and Sharratt, K. (2013) *COPING: Children of Prisoners, Interventions & Mitigations to Strengthen Mental Health*.
- 20 <sup>16</sup> Myers, B.J., Smarsh, T.M., Amlund-Hagen, K. and Kennon, S. (1999) 'Children of Incarcerated Mothers', *Journal of Child and Family Studies*, 8 (1), 11–25.
- 21 <sup>17</sup> Dumont, D. M., Allen, S. A., and Rich, J. D. (2014) "Sesame Street Goes to Jail: Physicians Should Follow." *Annals of Internal Medicine* 161(7), 522-523.
- 22 <sup>18</sup> Jones *et al.*, *op cit.* endnote 10.
- 23 <sup>19</sup> Turney, K. (2014) "Stress Proliferation across generation? Examining the Relationship between Parental Incarceration and Childhood Health." *Journal of Health and Social Behavior* 55(3), 302-319.
- 24 <sup>20</sup> van de Weijer, S.G.A., Smallbone, H.S., and Bouwman, V. (2018) 'Parental Imprisonment and Premature Mortality in Adulthood', *Journal of Developmental and Life-Course Criminology*, 4(2), 1–14.
- 25 <sup>21</sup> Pugh, G. and Lanskey, C. (2011) "'Dads Inside and Out': study of risk and protective factors in the resettlement of imprisoned fathers with their families". Conference paper for What's new in Research and Evaluation? Informing our work with prisoners and offenders and their families. Institute of Criminology, University of Cambridge, 19 May 2011.
- 26 <sup>22</sup> Families Outside (n.d.) *Supporting Prisoners' Families: What can Health Professionals do?* Edinburgh: Families Outside. <https://www.familiesoutside.org.uk/content/uploads/2019/07/Families-Outside-Health-web.pdf> (accessed 14 November 2019).
- 27 <sup>23</sup> Butterfield, F. (1999) "Parents in Prison: A Special Report: As Inmate Population Grows, So Does a Focus on Children". *New York Times*, 7 April 1999.
- 28 <sup>24</sup> Murray, J. and Farrington, D. P. (2008) "The Effects of Parental Imprisonment on Children," in M. Tonry (ed.) *Crime and Justice: A Review of Research* 37. Chicago: University of Chicago Press, 133-206.
- 29 <sup>25</sup> Available at: <https://www.youtube.com/watch?v=kKZP0QKnNYg> (accessed 14 November 2019).
- 30  
31  
32  
33  
34  
35  
36  
37  
38  
39  
40  
41  
42  
43  
44  
45  
46  
47  
48  
49  
50  
51  
52  
53  
54  
55  
56  
57  
58  
59  
60
